# Supplementary material for: Nonlinear transcriptomic response to dietary fat intake in the small intestine of C57BL/6J mice
Source: Springer Nature journal article supplement (doi:10.1186/s12864-016-2424-9), 2016-02-09
Supplement: MOESM2 [file 12864_2016_2424_MOESM2_ESM.pdf]

Raw Data (.CEL)

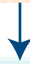

Data pre-processing (GCRMA, Quantile)  
& Quality assessment (RLE & NUSE)

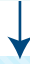

Analysis to identify Differentially Expressed Genes (DEG)

Linear, logarithmic, exponential, quadratic and cubic responses to dietary fat intake (specific to each intestine section; limma library)

Linear response

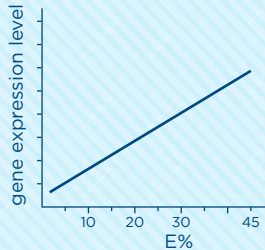

Logarithmic response

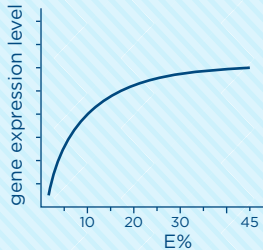

Exponential response

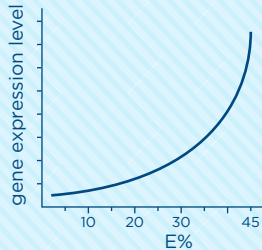

Quadratic response

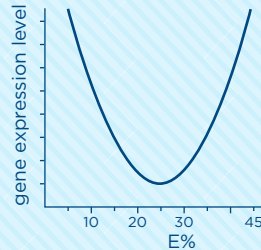

Cubic response

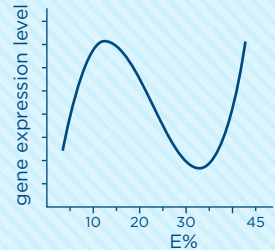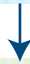

Hypergeometric test to find over-represented Gene Ontology (GO) terms,  
Biological Processes (BP)

Significant GO terms associated to linear, logarithmic, exponential, quadratic and cubic responses  
(specific to each intestine section; HTSanalyzeR library)

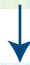

Analysis of GOBP terms exhibiting unique trends from proximal to distal small intestine
