# Supplementary material for: Nonlinear transcriptomic response to dietary fat intake in the small intestine of C57BL/6J mice
Source: Springer Nature journal article supplement (doi:10.1186/s12864-016-2424-9), 2016-02-09
Supplement: MOESM4 [file 12864_2016_2424_MOESM4_ESM.pdf]

1     **Additional file 4**

| Response<br>(Gene<br>expression<br>vs. Fat<br>intake) | Proximal        |            |                 | Middle          |            |                 | Distal          |            |                 |
|-------------------------------------------------------|-----------------|------------|-----------------|-----------------|------------|-----------------|-----------------|------------|-----------------|
|                                                       | Gene<br>(count) | Relative % | GOBP<br>(count) | Gene<br>(count) | Relative % | GOBP<br>(count) | Gene<br>(count) | Relative % | GOBP<br>(count) |
| Linear                                                | 1219            | 48.18      | 6               | 1439            | 50.03      | 16              | 366             | 50.76      | 3               |
| Logarithmic                                           | 719             | 28.42      | 7               | 443             | 15.40      | 11              | 45              | 6.24       | -               |
| Exponential                                           | 148             | 5.85       | 2               | 461             | 16.03      | 17              | 121             | 16.78      | 6               |
| Quadratic                                             | 212             | 8.38       | -               | 326             | 11.34      | -               | 85              | 11.79      | -               |
| Cubic                                                 | 232             | 9.17       | 1               | 207             | 7.20       | -               | 104             | 14.42      | 4               |

2

3     **Table A4: Count of genes that responded in a significant, dose-dependent way to fat intake (model**  
4 **selection based on AIC).** We identified the significant responses in three sections of small intestine (limma  
5 library, adjusted p-value < 0.1). Differential gene expression was modelled as either a linear or nonlinear  
6 (i.e., logarithmic, exponential, quadratic or cubic) function of dietary fat intake. For each section, we  
7 reported the percentage of genes per response type (%) and the number of significant GO terms (Biological  
8 Processes - GOBP; hypergeometric test, adjusted p-value < 0. 1). Only GOBP terms with, at least, six  
9 differentially expressed genes (in the whole small intestine) have been taken into account. Outcomes  
10 obtained by using AIC for model selection were coherent with the trends reported in the manuscript (i.e.,  
11 model selection based on the lowest p-value; see Table 1). In particular, with AIC we found: (I) the  
12 prevalence of linear-responding genes in all intestine sections; (II) the decreasing relative importance of the  
13 logarithmic response when moving from the proximal to the distal section (while the opposite pattern  
14 holds for the exponential response); (III) the marginal relevance of other response types (i.e., quadratic and  
15 cubic functions).
